# Supplementary material for: Unified method to integrate and blend several, potentially related, sources of information for genetic evaluation
Source: PubMed Central journal article supplement (PMC4179859; doi:10.1186/s12711-014-0059-3), 2014-09-30
Supplement: 12711_2014_59_MOESM1_ESM.pdf [file 12711_2014_59_MOESM1_ESM.pdf]

# Additional file 1

## Integration of two sources of external information into a genetic evaluation

The following Bayesian derivation is similar to the Bayesian derivation of Legarra et al. [13] that integrates one source of external information into an internal genetic evaluation in the context of multi-breed genetic evaluations for beef cattle.

Assume a set of animals partitioned in four groups. The first group (i.e. internal animals  $A_{1,2}^0$ ) has only records in the internal data set ( $\mathbf{y}_{E_0}$ ). The second group (i.e. external animals  $A_1$ ) has records in the external data set,  $\mathbf{y}_{E_1}$ , and may have records in  $\mathbf{y}_{E_0}$ . The third group (i.e. external animals  $A_2$ ) has records in the external data set,  $\mathbf{y}_{E_2}$ , and may have records in  $\mathbf{y}_{E_0}$ . The fourth group (i.e. external animals  $A_{1,2}$ ) have records in both  $\mathbf{y}_{E_1}$  and  $\mathbf{y}_{E_2}$ , and may have also records in  $\mathbf{y}_{E_0}$ . For the following genetic evaluations, variance components are assumed to be identical.

Concerning the notation of matrices in the following development (e.g.,  $\mathbf{X}_{E_i(A_i)}$ ), the subscript  $E_i$  refers to the  $i^{\text{th}}$  source of data and the subscript within brackets ( $A_i$ ) refers to the  $i^{\text{th}}$  group of animals, respectively.

Assume a hypothetical joint genetic evaluation (denoted by the subscript J) of all animals ( $A_{1,2}^0$ ,  $A_1$ ,  $A_2$ ,  $A_{1,2}$ ) including both datasets  $\mathbf{y}_{E_1}$  and  $\mathbf{y}_{E_2}$ . Because it was assumed that  $\mathbf{y}_{E_1}$  and  $\mathbf{y}_{E_2}$  were pre-corrected for fixed effects, the model partitioned among the four groups of animals can be written as:

$$\begin{bmatrix} \mathbf{y}_{E_1(A_1)} \\ \mathbf{y}_{E_1(A_{1,2})} \\ \mathbf{y}_{E_2(A_2)} \\ \mathbf{y}_{E_2(A_{1,2})} \end{bmatrix} = \begin{bmatrix} \mathbf{0} & \mathbf{Z}_{E_1(A_1)} & \mathbf{0} & \mathbf{0} \\ \mathbf{0} & \mathbf{0} & \mathbf{0} & \mathbf{Z}_{E_1(A_{1,2})} \\ \mathbf{0} & \mathbf{0} & \mathbf{Z}_{E_2(A_2)} & \mathbf{0} \\ \mathbf{0} & \mathbf{0} & \mathbf{0} & \mathbf{Z}_{E_2(A_{1,2})} \end{bmatrix} \begin{bmatrix} \mathbf{u}_{J(A_{1,2}^0)} \\ \mathbf{u}_{J(A_1)} \\ \mathbf{u}_{J(A_2)} \\ \mathbf{u}_{J(A_{1,2})} \end{bmatrix} + \begin{bmatrix} \mathbf{e}_{J_1(A_1)} \\ \mathbf{e}_{J_1(A_{1,2})} \\ \mathbf{e}_{J_2(A_2)} \\ \mathbf{e}_{J_2(A_{1,2})} \end{bmatrix}$$



(co)variance matrix including all animals and  $\begin{bmatrix} \mathbf{R}_{E_1}^{(A_1 A_1)} & \mathbf{R}_{E_1}^{(A_1 A_{1,2})} \\ \mathbf{R}_{E_1}^{(A_{1,2} A_1)} & \mathbf{R}_{E_1}^{(A_{1,2} A_{1,2})} \end{bmatrix}$  and  $\begin{bmatrix} \mathbf{R}_{E_2}^{(A_2 A_2)} & \mathbf{R}_{E_2}^{(A_2 A_{1,2})} \\ \mathbf{R}_{E_2}^{(A_{1,2} A_2)} & \mathbf{R}_{E_2}^{(A_{1,2} A_{1,2})} \end{bmatrix}$  are

the inverse of the residual (co)variance matrices associated with  $\mathbf{e}_{J_1}$  and  $\mathbf{e}_{J_2}$ , respectively.

Assume an internal genetic evaluation (denoted by the subscript  $E_0$ ) of all animals (i.e. animals  $A_{1,2}^0$ ,  $A_1$ ,  $A_2$  and  $A_{1,2}$ ) including only  $\mathbf{y}_{E_0}$  and using the prior distribution

$p(\hat{\mathbf{u}}_{E_0} | \mathbf{y}_{E_1}, \mathbf{y}_{E_2}) = \text{MVN}(\boldsymbol{\mu}, \mathbf{G}^*)$  [27] where  $\mathbf{G}^*$  is the inverse of the left-hand-side (LHS) of the equation 1.1 and  $\boldsymbol{\mu}$  is the solutions of the equation 1.1. The model for the genetic evaluation  $E_0$  can be written as:

$$\mathbf{y}_{E_0} = \mathbf{X}_{E_0} \boldsymbol{\beta}_{E_0} + \mathbf{Z}_{E_0} \mathbf{u}_{E_0} + \mathbf{e}_{E_0},$$

where  $\mathbf{X}_{E_0}$  and  $\mathbf{Z}_{E_0}$  are incidence matrices relating records in  $\mathbf{y}_{E_0}$  to the vector of fixed effects

$$\boldsymbol{\beta}_{E_0} \text{ and the vector of genetic random effects } \mathbf{u}_{E_0} = \begin{bmatrix} \mathbf{u}'_{E_0(A_{1,2}^0)} & \mathbf{u}'_{E_0(A_1)} & \mathbf{u}'_{E_0(A_2)} & \mathbf{u}'_{E_0(A_{1,2})} \end{bmatrix},$$

respectively and  $\mathbf{e}_{E_0}$  is the vector of residuals.

The MME can be written as:

$$\begin{bmatrix} \mathbf{X}'_{E_0} \mathbf{R}_{E_0}^{-1} \mathbf{X}_{E_0} & \mathbf{X}'_{E_0} \mathbf{R}_{E_0}^{-1} \mathbf{Z}_{E_0} \\ \mathbf{Z}'_{E_0} \mathbf{R}_{E_0}^{-1} \mathbf{X}_{E_0} & \mathbf{Z}'_{E_0} \mathbf{R}_{E_0}^{-1} \mathbf{Z}_{E_0} + \mathbf{G}^{*-1} \end{bmatrix} \begin{bmatrix} \hat{\boldsymbol{\beta}}_{E_0} \\ \hat{\mathbf{u}}_{E_0} \end{bmatrix} = \begin{bmatrix} \mathbf{X}'_{E_0} \mathbf{R}_{E_0}^{-1} \mathbf{y}_{E_0} \\ \mathbf{Z}'_{E_0} \mathbf{R}_{E_0}^{-1} \mathbf{y}_{E_0} + \mathbf{G}^{*-1} \boldsymbol{\mu} \end{bmatrix}, \quad (\text{equation 1.2})$$

where  $\mathbf{R}_{E_0}^{-1}$  is the inverse of the residual (co)variance matrix associated with  $\mathbf{e}_{E_0}$ .

However, the evaluation  $J$  (equation 1.1), and therefore  $\mathbf{G}^*$  and  $\boldsymbol{\mu}$ , are unknown.

Assume that two genetic evaluations (denoted by the subscripts  $E_1$  and  $E_2$ , respectively) for two groups of external animals (i.e. animals  $A_1$  and  $A_{1,2}$ , and animals  $A_2$  and  $A_{1,2}$ , respectively)

which do not include in the genealogy internal animals (i.e. animals  $A_{1,2}^0$  and  $A_2$ , and animals  $A_{1,2}^0$  and  $A_1$ , respectively) are known. The model for the genetic evaluation  $E_1$  of only external animals  $A_1$  and  $A_{1,2}$  including only  $\mathbf{y}_{E_1}$  and which does not include in the genealogy animals  $A_{1,2}^0$  and  $A_2$  can be written as:

$$\begin{bmatrix} \mathbf{y}_{E_1(A_1)} \\ \mathbf{y}_{E_1(A_{1,2})} \end{bmatrix} = \begin{bmatrix} \mathbf{Z}_{E_1(A_1)} & \mathbf{0} \\ \mathbf{0} & \mathbf{Z}_{E_1(A_{1,2})} \end{bmatrix} \begin{bmatrix} \mathbf{u}_{E_1(A_1)} \\ \mathbf{u}_{E_1(A_{1,2})} \end{bmatrix} + \begin{bmatrix} \mathbf{e}_{E_1(A_1)} \\ \mathbf{e}_{E_1(A_{1,2})} \end{bmatrix},$$

where  $\mathbf{u}_{E_1(A_1)}$  and  $\mathbf{u}_{E_1(A_{1,2})}$  are the vectors of genetic random effects for animals  $A_1$  and  $A_{1,2}$  for the genetic evaluation  $E_1$ .

The MME can be written as:

$$\begin{bmatrix} \mathbf{Z}'_{E_1(A_1)} \mathbf{R}_{E_1}^{(A_1 A_1)} \mathbf{Z}_{E_1(A_1)} + \mathbf{G}_{E_1}^{*(A_1 A_1)} & \mathbf{Z}'_{E_1(A_1)} \mathbf{R}_{E_1}^{(A_1 A_{1,2})} \mathbf{Z}_{E_1(A_{1,2})} + \mathbf{G}_{E_1}^{*(A_1 A_{1,2})} \\ \mathbf{Z}'_{E_1(A_{1,2})} \mathbf{R}_{E_1}^{(A_{1,2} A_1)} \mathbf{Z}_{E_1(A_1)} + \mathbf{G}_{E_1}^{*(A_{1,2} A_1)} & \mathbf{Z}'_{E_1(A_{1,2})} \mathbf{R}_{E_1}^{(A_{1,2} A_{1,2})} \mathbf{Z}_{E_1(A_{1,2})} + \mathbf{G}_{E_1}^{*(A_{1,2} A_{1,2})} \end{bmatrix} \begin{bmatrix} \hat{\mathbf{u}}_{E_1(A_1)} \\ \hat{\mathbf{u}}_{E_1(A_{1,2})} \end{bmatrix} \quad (\text{equation 1.3})$$

$$= \begin{bmatrix} \mathbf{Z}'_{E_1(A_1)} \mathbf{R}_{E_1}^{(A_1 A_1)} \mathbf{y}_{E_1(A_1)} \\ \mathbf{Z}'_{E_1(A_{1,2})} \mathbf{R}_{E_1}^{(A_{1,2} A_{1,2})} \mathbf{y}_{E_1(A_{1,2})} \end{bmatrix} = \mathbf{D}_{E_1}^{*-1} \begin{bmatrix} \hat{\mathbf{u}}_{E_1(A_1)} \\ \hat{\mathbf{u}}_{E_1(A_{1,2})} \end{bmatrix}$$

$$\text{where } \mathbf{G}_{E_1}^{*-1} = \begin{bmatrix} \mathbf{G}_{E_1}^{*(A_1 A_1)} & \mathbf{G}_{E_1}^{*(A_1 A_{1,2})} \\ \mathbf{G}_{E_1}^{*(A_{1,2} A_1)} & \mathbf{G}_{E_1}^{*(A_{1,2} A_{1,2})} \end{bmatrix} = \begin{bmatrix} \mathbf{G}_{E_1(A_1 A_1)} & \mathbf{G}_{E_1(A_1 A_{1,2})} \\ \mathbf{G}_{E_1(A_{1,2} A_1)} & \mathbf{G}_{E_1(A_{1,2} A_{1,2})} \end{bmatrix}^{-1} \text{ is the inverse of the additive}$$

genetic (co)variance matrix for the external genetic evaluation  $E_1$ .

Similarly, the MME for the genetic evaluation  $E_2$  of only external animals  $A_2$  and  $A_{1,2}$  including only  $\mathbf{y}_{E_2}$  and which does not include in genealogy animals  $A_{1,2}^0$  and  $A_1$  can be written as:

$$\begin{bmatrix} \mathbf{Z}'_{E_2(A_2)} \mathbf{R}_{E_2}^{(A_2A_2)} \mathbf{Z}_{E_2(A_2)} + \mathbf{G}_{E_2}^{*(A_2A_2)} & \mathbf{Z}'_{E_2(A_2)} \mathbf{R}_{E_2}^{(A_2A_{1,2})} \mathbf{Z}_{E_2(A_{1,2})} + \mathbf{G}_{E_2}^{*(A_2A_{1,2})} \\ \mathbf{Z}'_{E_2(A_{1,2})} \mathbf{R}_{E_2}^{(A_{1,2}A_2)} \mathbf{Z}_{E_2(A_2)} + \mathbf{G}_{E_2}^{*(A_{1,2}A_2)} & \mathbf{Z}'_{E_2(A_{1,2})} \mathbf{R}_{E_2}^{(A_{1,2}A_{1,2})} \mathbf{Z}_{E_2(A_{1,2})} + \mathbf{G}_{E_2}^{*(A_{1,2}A_{1,2})} \end{bmatrix} \begin{bmatrix} \hat{\mathbf{u}}_{E_2(A_2)} \\ \hat{\mathbf{u}}_{E_2(A_{1,2})} \end{bmatrix} \quad (\text{equation 1.4})$$

$$= \begin{bmatrix} \mathbf{Z}'_{E_2(A_2)} \mathbf{R}_{E_2}^{(A_2A_2)} \mathbf{y}_{E_2(A_2)} \\ \mathbf{Z}'_{E_2(A_{1,2})} \mathbf{R}_{E_2}^{(A_{1,2}A_{1,2})} \mathbf{y}_{E_2(A_{1,2})} \end{bmatrix} = \mathbf{D}_{E_2}^{*-1} \begin{bmatrix} \hat{\mathbf{u}}_{E_2(A_2)} \\ \hat{\mathbf{u}}_{E_2(A_{1,2})} \end{bmatrix}$$

where  $\hat{\mathbf{u}}_{E_2(A_2)}$  and  $\hat{\mathbf{u}}_{E_2(A_{1,2})}$  are the vectors of genetic random effects for animals  $A_2$  and  $A_{1,2}$  for

the genetic evaluation  $E_2$ , and  $\mathbf{G}_{E_2}^{*-1} = \begin{bmatrix} \mathbf{G}_{E_2}^{*(A_2A_2)} & \mathbf{G}_{E_2}^{*(A_2A_{1,2})} \\ \mathbf{G}_{E_2}^{*(A_{1,2}A_2)} & \mathbf{G}_{E_2}^{*(A_{1,2}A_{1,2})} \end{bmatrix} = \begin{bmatrix} \mathbf{G}_{E_2(A_2A_2)} & \mathbf{G}_{E_2(A_2A_{1,2})} \\ \mathbf{G}_{E_2(A_{1,2}A_2)} & \mathbf{G}_{E_2(A_{1,2}A_{1,2})} \end{bmatrix}^{-1}$  is the

additive genetic (co)variance matrix for the genetic evaluation  $E_2$ .

Therefore,

$$\mathbf{D}_{E_1}^{*-1} - \mathbf{G}_{E_1}^{*-1} = \begin{bmatrix} \mathbf{D}_{E_1}^{*(A_1A_1)} & \mathbf{D}_{E_1}^{*(A_1A_{1,2})} \\ \mathbf{D}_{E_1}^{*(A_{1,2}A_1)} & \mathbf{D}_{E_1}^{*(A_{1,2}A_{1,2})} \end{bmatrix} - \begin{bmatrix} \mathbf{G}_{E_1}^{*(A_1A_1)} & \mathbf{G}_{E_1}^{*(A_1A_{1,2})} \\ \mathbf{G}_{E_1}^{*(A_{1,2}A_1)} & \mathbf{G}_{E_1}^{*(A_{1,2}A_{1,2})} \end{bmatrix} \quad (\text{equation 1.5})$$

$$= \begin{bmatrix} \mathbf{Z}'_{E_1(A_1)} \mathbf{R}_{E_1}^{(A_1A_1)} \mathbf{Z}_{E_1(A_1)} & \mathbf{Z}'_{E_1(A_1)} \mathbf{R}_{E_1}^{(A_1A_{1,2})} \mathbf{Z}_{E_1(A_{1,2})} \\ \mathbf{Z}'_{E_1(A_{1,2})} \mathbf{R}_{E_1}^{(A_{1,2}A_1)} \mathbf{Z}_{E_1(A_1)} & \mathbf{Z}'_{E_1(A_{1,2})} \mathbf{R}_{E_1}^{(A_{1,2}A_{1,2})} \mathbf{Z}_{E_1(A_{1,2})} \end{bmatrix}$$

and, similarly,

$$\mathbf{D}_{E_2}^{*-1} - \mathbf{G}_{E_2}^{*-1} = \begin{bmatrix} \mathbf{Z}'_{E_2(A_2)} \mathbf{R}_{E_2}^{(A_2A_2)} \mathbf{Z}_{E_2(A_2)} & \mathbf{Z}'_{E_2(A_2)} \mathbf{R}_{E_2}^{(A_2A_{1,2})} \mathbf{Z}_{E_2(A_{1,2})} \\ \mathbf{Z}'_{E_2(A_{1,2})} \mathbf{R}_{E_2}^{(A_{1,2}A_2)} \mathbf{Z}_{E_2(A_2)} & \mathbf{Z}'_{E_2(A_{1,2})} \mathbf{R}_{E_2}^{(A_{1,2}A_{1,2})} \mathbf{Z}_{E_2(A_{1,2})} \end{bmatrix} \quad (\text{equation 1.6}).$$

Substituting “unknown” terms of the equation 1.1 by their corresponding terms from the equations 1.3, 1.4, 1.5 and 1.6, the MME (equation 1.1) can be written as:





Similarly, MME for a genetic evaluation of all animals including only  $\mathbf{y}_{E_2}$  can be written as:

$$\begin{aligned}
 & \begin{bmatrix} \mathbf{G}_{E_2}^{(A_{1,2}^0 A_{1,2}^0)} & \mathbf{G}_{E_2}^{(A_{1,2}^0 A_1)} & & \mathbf{G}_{E_2}^{(A_{1,2}^0 A_2)} & & \mathbf{G}_{E_2}^{(A_{1,2}^0 A_{1,2})} \\ \mathbf{G}_{E_2}^{(A_1 A_{1,2}^0)} & \mathbf{G}_{E_2}^{(A_1 A_1)} & & \mathbf{G}_{E_2}^{(A_1 A_2)} & & \mathbf{G}_{E_2}^{(A_1 A_{1,2})} \\ \mathbf{G}_{E_2}^{(A_2 A_{1,2}^0)} & \mathbf{G}_{E_2}^{(A_2 A_1)} & \mathbf{Z}'_{E_2(A_2)} \mathbf{R}_{E_2}^{(A_2 A_2)} \mathbf{Z}_{E_2(A_2)} + \mathbf{G}_{E_2}^{(A_2 A_2)} & & \mathbf{Z}'_{E_2(A_2)} \mathbf{R}_{E_2}^{(A_2 A_{1,2})} \mathbf{Z}_{E_2(A_{1,2})} + \mathbf{G}_{E_2}^{(A_2 A_{1,2})} & \\ \mathbf{G}_{E_2}^{(A_{1,2} A_{1,2}^0)} & \mathbf{G}_{E_2}^{(A_{1,2} A_1)} & \mathbf{Z}'_{E_2(A_{1,2})} \mathbf{R}_{E_2}^{(A_{1,2} A_2)} \mathbf{Z}_{E_2(A_2)} + \mathbf{G}_{E_2}^{(A_{1,2} A_2)} & & \mathbf{Z}'_{E_2(A_{1,2})} \mathbf{R}_{E_2}^{(A_{1,2} A_{1,2})} \mathbf{Z}_{E_2(A_{1,2})} + \mathbf{G}_{E_2}^{(A_{1,2} A_{1,2})} & \\ & & & & & \end{bmatrix} \begin{bmatrix} \hat{\mathbf{u}}_{E_2(A_{1,2}^0)} \\ \hat{\mathbf{u}}_{E_2(A_1)} \\ \hat{\mathbf{u}}_{E_2(A_2)} \\ \hat{\mathbf{u}}_{E_2(A_{1,2})} \end{bmatrix} = \mathbf{D}_{E_2}^{-1} \hat{\mathbf{u}}_{E_2} \\
 & = \begin{bmatrix} \mathbf{0} \\ \mathbf{Z}'_{E_2(A_1)} \mathbf{R}_{E_2}^{(A_1 A_1)} \mathbf{y}_{E_2(A_1)} \\ \mathbf{0} \\ \mathbf{Z}'_{E_2(A_{1,2})} \mathbf{R}_{E_2}^{(A_{1,2} A_{1,2})} \mathbf{y}_{E_2(A_{1,2})} \end{bmatrix}
 \end{aligned}$$

(equation 1.10).

However, although the vectors  $\begin{bmatrix} \hat{\mathbf{u}}_{E_1(A_{1,2}^0)} \\ \hat{\mathbf{u}}_{E_1(A_2)} \end{bmatrix}$  and  $\begin{bmatrix} \hat{\mathbf{u}}_{E_2(A_{1,2}^0)} \\ \hat{\mathbf{u}}_{E_2(A_1)} \end{bmatrix}$  remain unknown in practice, they could be

predicted from the known vectors  $\begin{bmatrix} \hat{\mathbf{u}}_{E_1(A_1)} \\ \hat{\mathbf{u}}_{E_1(A_{1,2})} \end{bmatrix}$  and  $\begin{bmatrix} \hat{\mathbf{u}}_{E_2(A_2)} \\ \hat{\mathbf{u}}_{E_2(A_{1,2})} \end{bmatrix}$ , e.g. through the selection index theory,

respectively.

Therefore, the MME (1.1) can be written as

$$\left[ \mathbf{G}_{E_0}^{-1} + \left( \mathbf{D}_{E_1}^{-1} - \mathbf{G}_{E_1}^{-1} \right) + \left( \mathbf{D}_{E_2}^{-1} - \mathbf{G}_{E_2}^{-1} \right) \right] \hat{\mathbf{u}}_J = \left[ \mathbf{D}_{E_1}^{-1} \hat{\mathbf{u}}_{E_1} + \mathbf{D}_{E_2}^{-1} \hat{\mathbf{u}}_{E_2} \right] \text{ (equation 1.11)}.$$

By replacing  $\mathbf{G}^{*-1}$  in the equation 1.2 by the LHS of the equation 1.11 and  $\mathbf{G}^{*-1} \boldsymbol{\mu}$  by the RHS of the equation 1.11, we obtain:

$$\begin{bmatrix} \mathbf{X}'_{E_0} \mathbf{R}_{E_0}^{-1} \mathbf{X}_{E_0} & & \mathbf{X}'_{E_0} \mathbf{R}_{E_0}^{-1} \mathbf{Z}_{E_0} \\ \mathbf{Z}'_{E_0} \mathbf{R}_{E_0}^{-1} \mathbf{X}_{E_0} & \mathbf{Z}'_{E_0} \mathbf{R}_{E_0}^{-1} \mathbf{Z}_{E_0} + \mathbf{G}_{E_0}^{-1} + \left( \mathbf{D}_{E_1}^{-1} - \mathbf{G}_{E_1}^{-1} \right) + \left( \mathbf{D}_{E_2}^{-1} - \mathbf{G}_{E_2}^{-1} \right) \end{bmatrix} \begin{bmatrix} \hat{\boldsymbol{\beta}}_{E_0} \\ \hat{\mathbf{u}}_{E_0} \end{bmatrix} = \begin{bmatrix} \mathbf{X}'_{E_0} \mathbf{R}_{E_0}^{-1} \mathbf{y}_{E_0} \\ \mathbf{Z}'_{E_0} \mathbf{R}_{E_0}^{-1} \mathbf{y}_{E_0} + \mathbf{D}_{E_1}^{-1} \hat{\mathbf{u}}_{E_1} + \mathbf{D}_{E_2}^{-1} \hat{\mathbf{u}}_{E_2} \end{bmatrix}.$$

This development could be extended to more than two sources of external information.
